# Supplementary material for: Potassium ferrite nanosheets with tin doping for enhanced large-current-density H2 production and ultra-long life rechargeable Zn–air batteries
Source: Royal Society of Chemistry journal article supplement (doi:10.1039/d3ta07800k), 2024-01-01
Supplement: d3ta07800k1.pdf [file d3ta07800k1.pdf]

## Supporting Information

### **Potassium Ferrite Nanosheets with Tin Doping for Enhanced Large-Current-Density H<sub>2</sub> Production and Ultra-Long Life Rechargeable Zn-Air Battery**

Juan Jian,<sup>a</sup> Zhuo Wang,<sup>a</sup> Yu Qiao,<sup>a</sup> Fen Yao,<sup>a</sup> Meiting Wang,<sup>a</sup> Limin Chang<sup>a,\*</sup> and Ping Nie<sup>a,\*</sup>

<sup>a</sup> Key Laboratory of Preparation and Applications of Environmental Friendly Material of the Ministry of Education, College of Chemistry, Jilin Normal University, Changchun 130103, P. R. China

\* Corresponding authors' E-mails: changlimin2139@163.com; xdnieping2009@sina.com

## **1. Material and Experimental Instruments**

### **1.1 Materials used in the experiment**

Pt/C (20 wt%) was obtained from Macklin Ltd. (Shanghai, China), RuO<sub>2</sub> was synthesized from ruthenium chloride hydrate (RuCl<sub>3</sub>·xH<sub>2</sub>O) purchased from Aladdin Ltd. (Shanghai, China).<sup>[1]</sup> Nickel foam (NF) was provided by the Li Yuan Technology Co. Ltd. (Shanxi, China). KOH, Fe(NO<sub>3</sub>)<sub>3</sub>·9H<sub>2</sub>O, Na<sub>2</sub>SnO<sub>3</sub>·3H<sub>2</sub>O, HCl and other chemicals are supplied by the Beijing Chemical Reagents Company. Apart from the NF, all the chemicals are analytical pure and do not need further purification.

### **1.2 Experimental Section**

#### ***Basic Phase Characterizations***

X-ray diffraction (XRD) experiment was tested on a Rigaku D-Max 2550 diffractometer with Cu-Kα radiation ( $\lambda = 1.5418 \text{ \AA}$ ). Scanning electron microscope (SEM) and energy dispersive X-ray spectroscopy (EDX) images were obtained on a JEOL-6700 scanning electron microscope. Transmission electron microscope (TEM), high resolution TEM (HRTEM) images were obtained with microscopy of Philips-FEI Tecnai G2S-Twin, equipped with a field emission gun operating at 200 kV. X-ray photoelectron spectra (XPS) analysis was performed on a VG Scienta R3000 spectrometer with Al Kα (1486.6 eV) as the X-ray source. Contact angle (CA) experiment was analyzed by the machine of Dataphysics OCA20 at room temperature.

#### ***Electrochemical Measurements***

The electrochemical measurements were conducted using the three-electrode system with the electrochemical workstation (CHI 760e). The as-prepared electrodes were directly used as the working electrodes; meanwhile, graphite rod and Hg/HgO electrode were served as counter and reference electrodes, respectively. 1.0 M KOH solution was used as

electrolyte for HER, OER and OWS devices, while 0.1 M KOH were applied for the ORR process. Potentials were normalized versus the standard hydrogen electrode (RHE) according to formula below:

$$E_{(RHE)} = E_{(Hg/HgO)} + 0.098 \text{ V} + 0.0591 \text{ pH} \quad (1)$$

Here, “ $E_{(Hg/HgO)}$ ” is the potential we directly measured during the experiment.

Polarization curves were performed via sweeping potentials at a scan rate of  $2.0 \text{ mV s}^{-1}$ . The measured potentials were calibrated with  $iR$  compensation. Corresponding stability data were examined through current-time curves at the constant potentials.

The loading was calculated through a series of parallel experiments, the mass changes of NF-based materials before and after the synthesis reaction were used to determine the loading capacity.

#### **Tafel slope:**

The data of Tafel slope can be plotted by the gained linear sweep voltammetry (LSV) curves, which is obtained from the follow equation:

$$\eta = a + b \log j \quad (2)$$

Where, “ $\eta$ ” refers to the overpotential; “ $j$ ” is the current density; “ $a$ ” relates to the  $j_0$  (exchange current density) and can be reflected by the intercept; “ $b$ ” is the Tafel slope we need to acquire.

#### **Electrochemical surface area (ECSA)**

The ECSA is calculated by the formula below:

$$\text{ECSA} = A * C_{dl} / C_s \quad (3)$$

Where “ $A$ ” refers to the area of the working electrode, and we set the electrode area to  $0.25 \text{ cm}^2$  throughout the electrocatalytic water splitting testing; “ $C_s$ ” relates to the electrolyte and  $C_s = 0.04 \text{ mF cm}^{-2}$ , “ $C_{dl}$ ” is the abbreviation of double layer capacitance and

calculated from a series of CV curves that tested within the non-Faraday potential range (0.9254-1.0254 V vs. RHE), scan rate changed from 10 to 100 mV s<sup>-1</sup>, increased with 10 mV s<sup>-1</sup> each time.

#### **Faraday efficiency (FE):**

Faraday efficiency (FE) of Sn-KFO for OER/HER can be calculated by the ratio of the amount of O<sub>2</sub>/H<sub>2</sub> collected by drainage method and the theoretical O<sub>2</sub>/H<sub>2</sub>. Take OER for example, the actual amount O<sub>2</sub> production (labeled as n<sub>O-experimental</sub>) can be calculated using the equation of n<sub>O-experimental</sub> = V/V<sub>m</sub>, where V is the volume of O<sub>2</sub> collected from the chronoamperometry testing; V<sub>m</sub> is molar volume of ideal gas, and V<sub>m</sub> = 22.4 L mol<sup>-1</sup>. For the theoretical O<sub>2</sub> (marked as n<sub>O-theoretical</sub>) accumulated during the OER. According the OER equation of 4OH<sup>-</sup> → O<sub>2</sub> + 2H<sub>2</sub>O + 4e<sup>-</sup>, where, the electrolytic efficiency (η) can be measured by the equation of η = z\*n\*F/Q. Here, “n” is the mole of O<sub>2</sub> generated during the OER, and can be marked as n<sub>O-theoretical</sub>; “z” is the number of transferred electrons generated per mole of O<sub>2</sub> during the OER, here, z = 4; “F” is the Faraday constant, F = 96485 C mol<sup>-1</sup>; “Q” refers to the actual quantity of electric charge, and can be calculated by the flume of Q = ∑ i\*t. In the chronoamperometry experiment, the Q can be directly calculated. To evaluate the FE of a catalyst for OER, we assume that 100 % current efficiency occurs during the whole reaction. Hence, 1 = 4\*F\*n<sub>O-theoretical</sub>/Q, therefore, n<sub>O-theoretical</sub> = Q/(4\*F). The calculation of FE for HER is similar with the OER, merely the the number of transferred electrons generated per mole of H<sub>2</sub> during the HER is 2.

#### ***Assembly and Testing of the Zn-Air Battery***

As for the liquid Zn-air battery, in order to avoid electrolyte leakage, we physically compounded the NF-based catalyst with the waterproof/breathable carbon film, and then assembled the complex as the air-cathode of the Zn-air battery.

Both the charge and discharge curves were measured by the CHI 760e, the power density was calculated from the data of the discharge curve. Charge-discharge curves at current density of  $10 \text{ mA cm}^{-2}$  in this work were measured by the Land battery test system.

## 2. Theoretical Section

### *Computation Details*

The KFO is a new 3D open-framework ferrite, which belongs to the trigonal space group  $P\bar{3}1m$ , and the optimized unit cell parameters are  $a = b = 5.006 \text{ \AA}$  and  $c = 6.633 \text{ \AA}$ , all of which are very close to the corresponding experimental values ( $a = b = 5.155$  and  $c = 6.902 \text{ \AA}$ ).<sup>[2]</sup> First-principles calculations were carried out using density functional theory (DFT) with generalized gradient approximation (GGA) of Perdew-Burke-Ernzerhof (PBE) implemented in the Vienna Ab-Initio Simulation Package (VASP).<sup>[3]</sup> The valence electronic states were expanded on the basis of plane waves with the core-valence interaction represented using the projector augmented plane wave (PAW) approach and a cutoff of 520 eV.<sup>[4]</sup> A 1.75 layered (001) facet was cleaved with the vacuum slab height of 20 Å. A  $3 \times 3$  supercell containing 117 O, 18 K and 72 Fe atoms were studied. To model the substitution, a Fe atom in octahedral coordination was replaced by a Sn atom, and can be modeled by the corresponding slab (Fig. S11). A  $\Gamma$ -centered k-mesh of  $2 \times 2 \times 1$  was used for the Fe-O surface calculations. During the computational process, the outermost Fe-O layer in the theoretical slab model is fully relaxed without any symmetry or direction restrictions, while the remaining atoms are kept frozen.

The adsorption energy of H was calculated based on the following equation:

$$\Delta E = E_{\text{slab-H}} - 0.5E_{\text{H}_2} - E_{\text{slab}} \quad (4)$$

Where,  $E_{\text{slab-H}}$ ,  $E_{\text{H}_2}$ , and  $E_{\text{slab}}$  are the total energy of the whole system, the  $\text{H}_2$  molecule, and the slab, respectively.

Then, the reaction free energy change can be obtained from equation below:

$$\Delta G = \Delta E + \Delta \text{ZPE} - T\Delta S \quad (5)$$

Here, the difference in zero-point energies,  $\Delta ZPE$ , and the change in entropy  $\Delta S$  are determined by using DFT-calculated vibrational frequencies and standard tables for the gas-phase molecule.<sup>[5]</sup>

### 3. Supplementary Figures and Tables

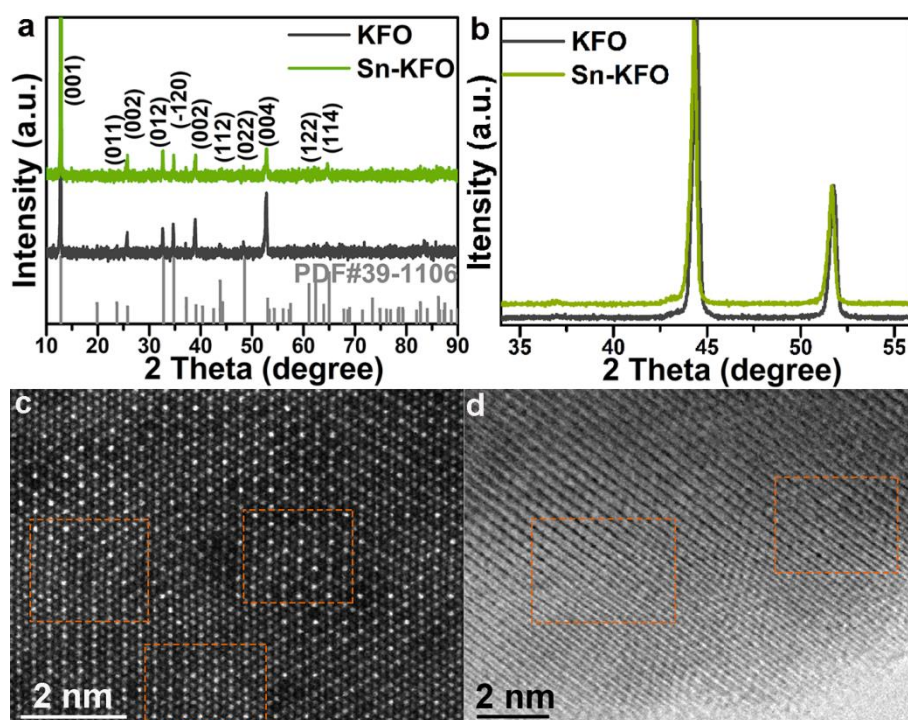

**Fig. S1.** The XRD results of (a) KFO powder and Sn-KFO powder, (b) enlarged patterns of NF based KFO and Sn-KFO. (c, d) The AC HADDF-STEM images of the Sn-KFO.

Obviously, the patterns of Sn-KFO powder illustrated in Fig. S1a is well consistent with that of the pure KFO powder. This confirms that the as synthesized NF based catalyst is the KFO-based material. As shown in Fig. S1b, comparing with the pure KFO, the XRD pattern of Sn-KFO displayed a slightly low degree shift, which mainly attribute to the introduction of Sn. Additionally, the AC HADDF-STEM images displayed in Fig. S1c,d also confirm the slight change in lattice spacing after the Sn-doping.

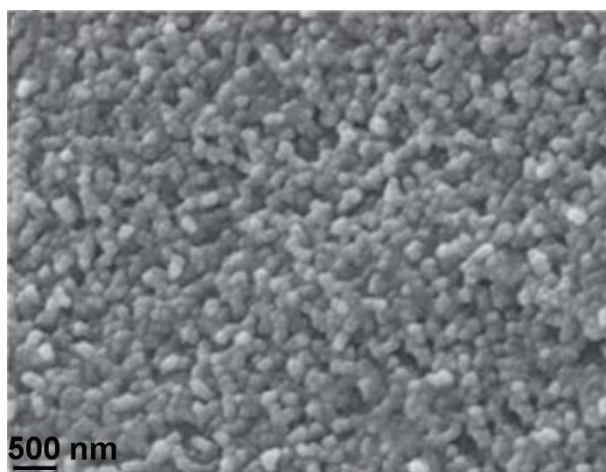

**Fig. S2.** The SEM image of pure KFO.

**Table S1.**  $C_{dl}$ , ECSA and related data of KFO and Sn-KFO.

| Catalyst | $C_{dl}$ (mF cm <sup>-2</sup> ) | $C_s$ (mF cm <sup>-2</sup> ) | A (cm <sup>2</sup> ) | ECSA (cm <sup>2</sup> ) |
|----------|---------------------------------|------------------------------|----------------------|-------------------------|
| KFO      | 3.25                            | 0.04                         | 0.25                 | 20.31                   |
| Sn-KFO   | 3.95                            | 0.04                         | 0.25                 | 24.69                   |

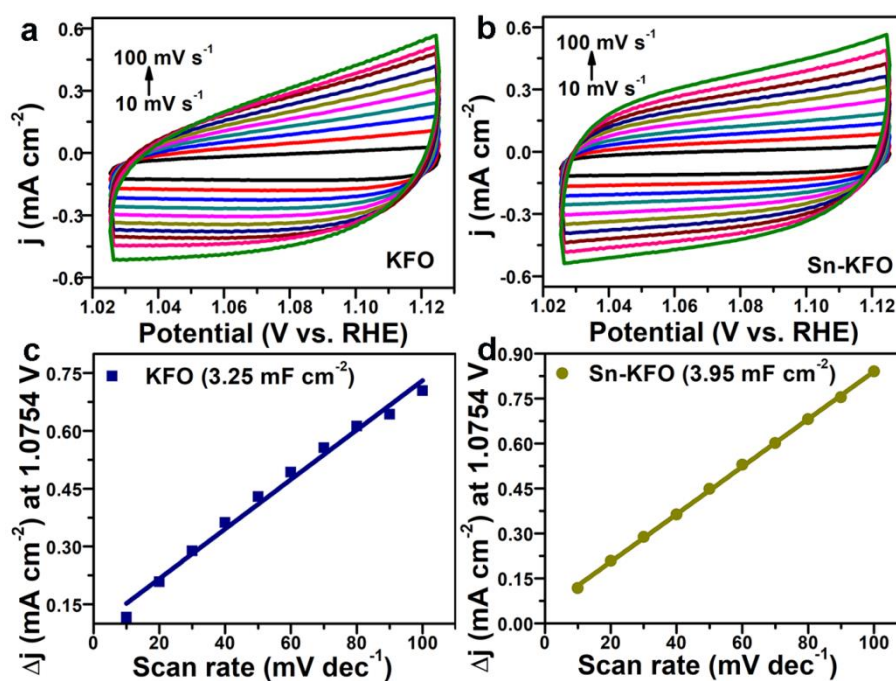

**Fig. S3.** The CV curves at different scan rate of (a) KFO, (b) Sn-KFO, and (c, d) their corresponding relationships between scan rate and  $\Delta j = 1.0754$  V.

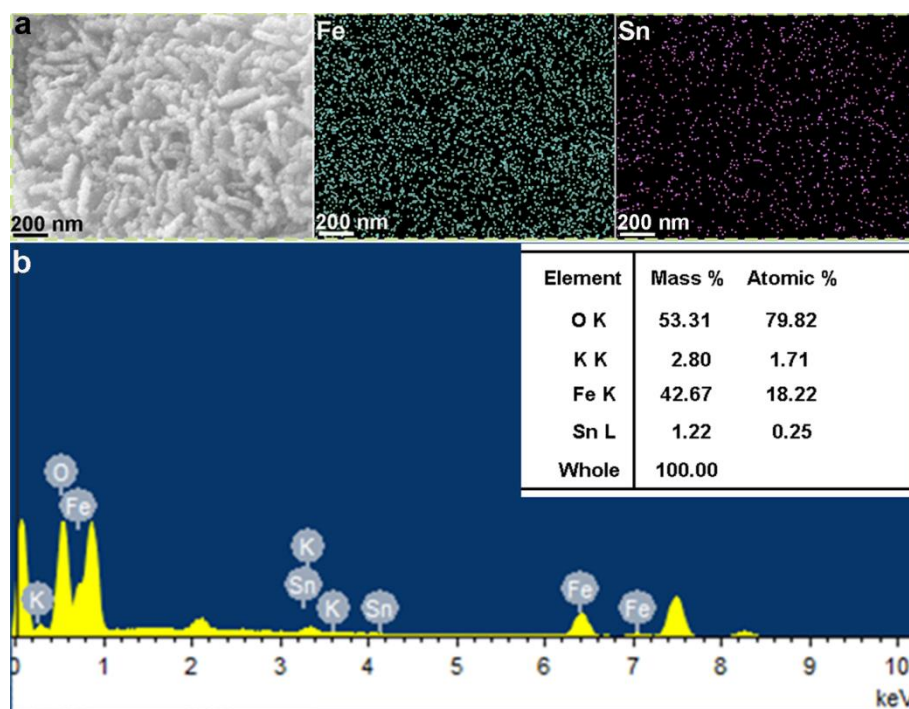

**Fig. S4.** SEM-mapping and corresponding content of constituent elements of Sn-KFO.

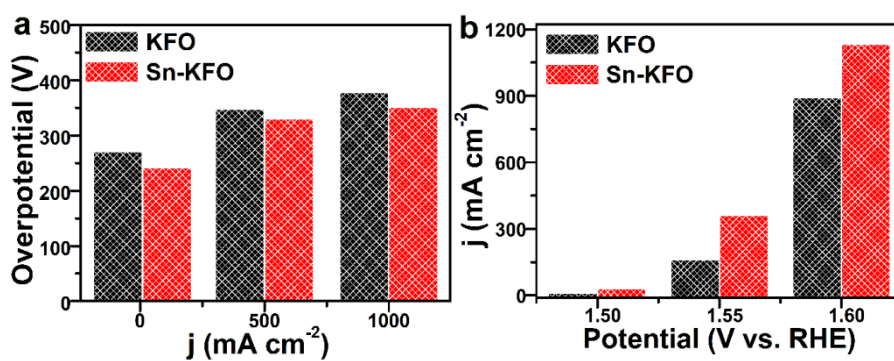

**Fig. S5.** (a, b) The bar-graphs between current density ( $j$ ) and potential ( $V$ ) of Sn-KFO and KFO during the OER process.

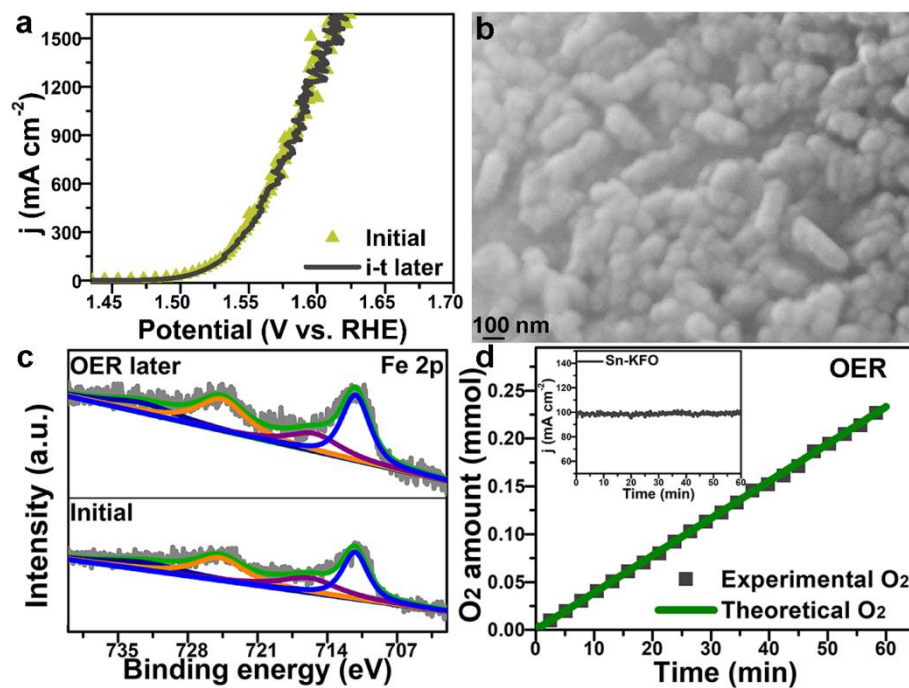

**Fig. S6.** The (a) LSV curve that i-t test later, (b) SEM image (c) Fe 2p spectra and (d) Faraday efficiency of Sn-KFO that after the OER course.

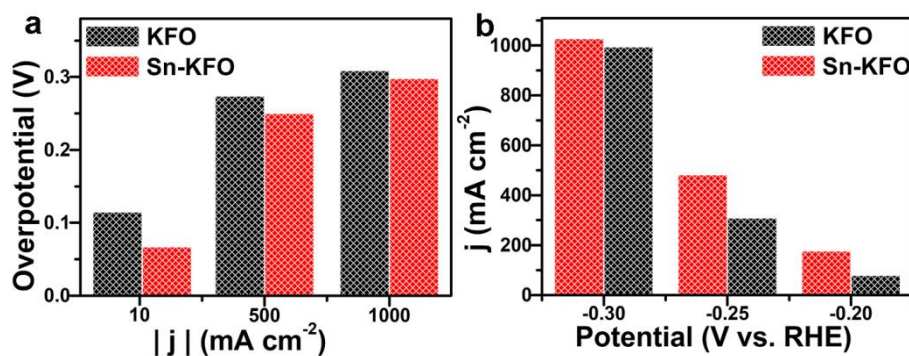

**Fig. S7.** (a, b) The bar-graphs between current density ( $j$ ) and potential (V) of Sn-KFO and KFO during the HER process.

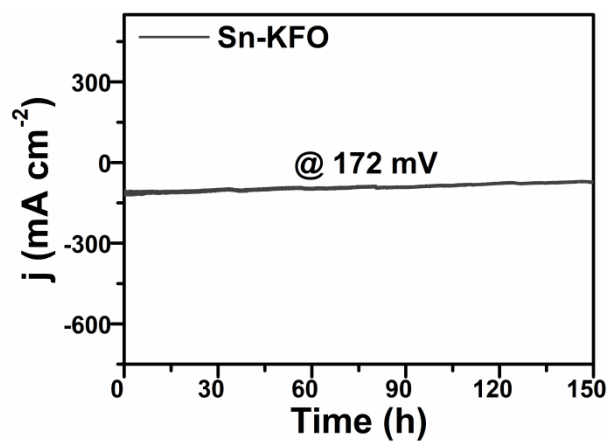

**Fig. S8.** The i-t curves of Sn-KFO for the HER course.

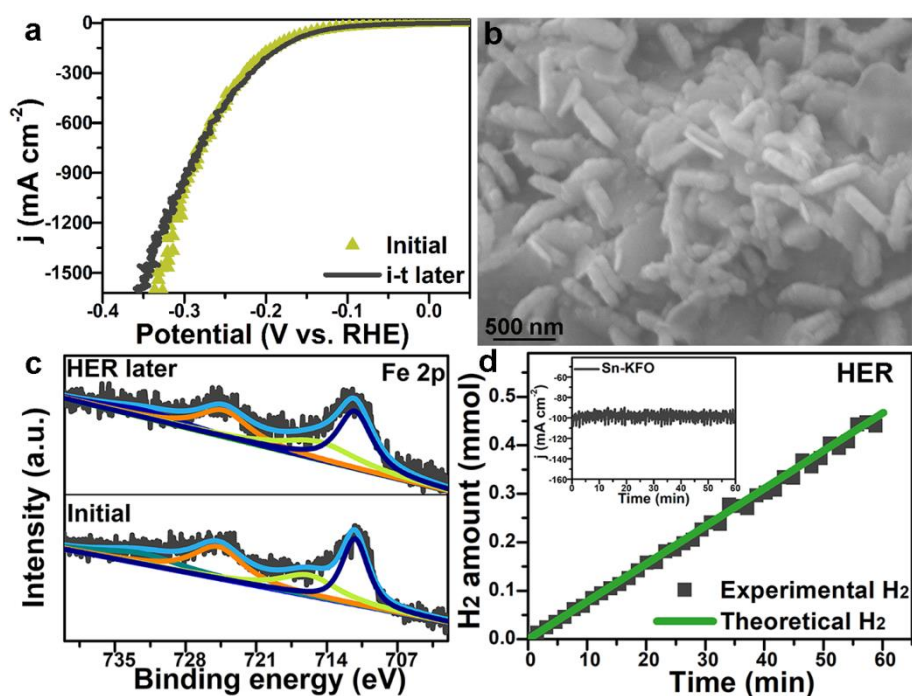

**Fig. S9.** The (a) LSV curve that i-t test later, (b) SEM image (c) Fe 2p spectra and (d) Faraday efficiency of Sn-KFO that after the OER course.

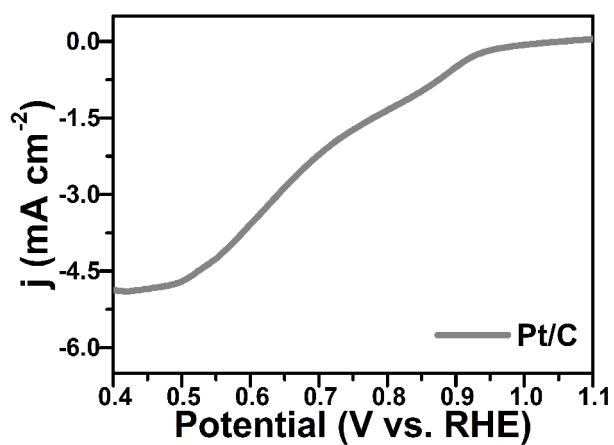

**Fig. S10.** The ORR plot of NF based Pt/C electrode.

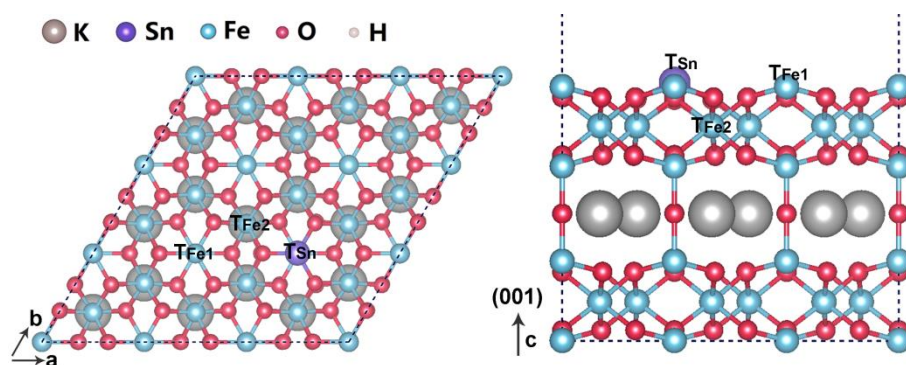

**Fig. S11.** The top and side views of the slab model corresponding to the (001) surface for the Sn-KFO system.

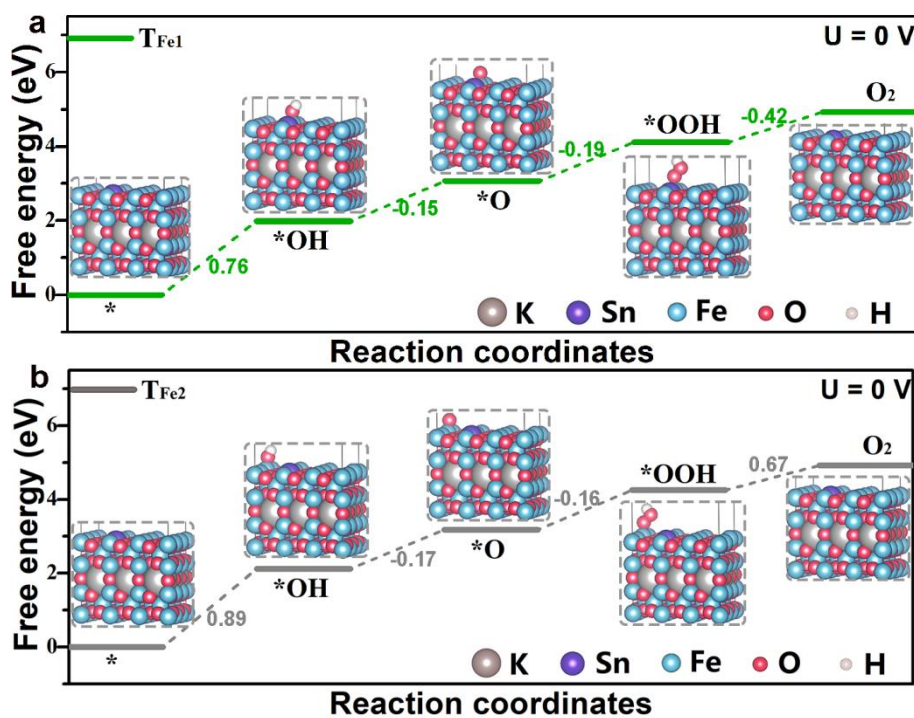

**Fig. S12.** The theory calculation at (a)  $T_{Fe1}$  and (b)  $T_{Fe2}$  site when  $U = 0$ , insert atomic structure diagrams are the corresponding absorptive state.

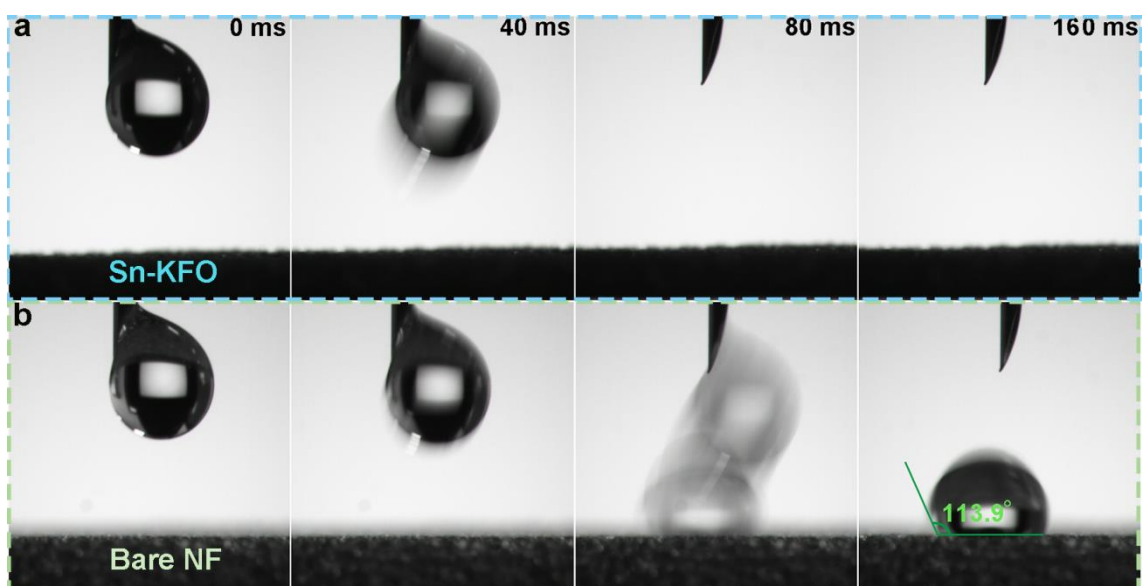

**Fig. S13.** Contact angel testing images of Sn-KFO and bare NF that at 0, 40, 80 and 160 ms after the water droplets come into contact with the surface of the material.

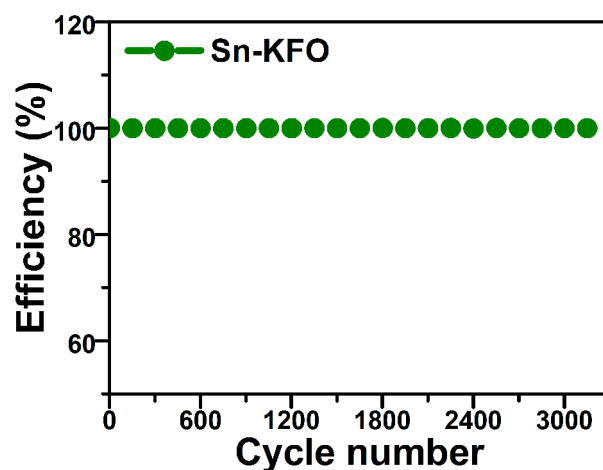

**Fig. S14.** The Coulombic efficiency of the Zn-air assembled with Sn-KFO serving as air-cathode, one cycle of charging-discharging needs 20 min at current density of  $10 \text{ mA cm}^{-2}$ .

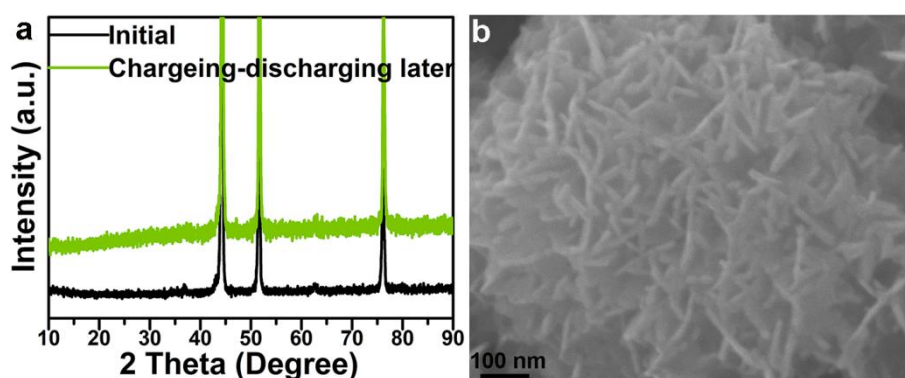

**Fig. S15.** (a) The XRD result and (b) SEM image of Sn-KFO that after the long-time charging and discharging process.

**Table S2.** A properties comparison of various electrocatalysts for overall water splitting (OWS).

| Catalys (OWS)                                                      | Voltage at $10 \text{ mA cm}^{-2}$ (V) | Voltage at $100 \text{ mA cm}^{-2}$ (V) | Reference |
|--------------------------------------------------------------------|----------------------------------------|-----------------------------------------|-----------|
| Sn-KFO                                                             | 1.55                                   | 1.70                                    | This work |
| KFO                                                                | 1.59                                   | 1.73                                    | This work |
| Pt/C  RuO <sub>2</sub>                                             | 1.54                                   | 1.81                                    | This work |
| Co/CNFs                                                            | 1.60                                   | —                                       | [6]       |
| Co <sub>9</sub> S <sub>8</sub> /Ni <sub>3</sub> S <sub>2</sub> /NF | 1.64                                   | —                                       | [7]       |
| CoMoO nanosheet arrays@NF                                          | 1.68                                   | ≈1.88                                   | [8]       |
| Ni <sub>3</sub> FeN/r-GO                                           | 1.60                                   | ≈1.96                                   | [9]       |
| P-Co <sub>3</sub> O <sub>4</sub> /NF                               | 1.63                                   | —                                       | [10]      |
| CoP@3D Ti <sub>3</sub> C <sub>2</sub> -Mxene                       | 1.57                                   | ≈1.70                                   | [11]      |

|                                                  |      |       |      |
|--------------------------------------------------|------|-------|------|
| P-doped Co-Ni-S/NF                               | 1.60 | —     | [12] |
| RuO <sub>2</sub> /NiO/NF                         | 1.50 | —     | [13] |
| Fe-Ni <sub>2</sub> P                             | 1.49 | ≈1.73 | [14] |
| Ni <sub>3</sub> S <sub>2</sub> -NGQDs/NF         | 1.58 | —     | [15] |
| NiFe/Ni(OH) <sub>2</sub> /NiAl                   | 1.59 | —     | [16] |
| MoP/Ni <sub>2</sub> P/NF                         | 1.55 | —     | [17] |
| N(P)-doped 304-type stainless steel mesh         | 1.74 | —     | [18] |
| Cu@CoS <sub>x</sub> /Cu Foam                     | 1.50 | 1.80  | [19] |
| CoFePO/NF                                        | 1.56 | ≈1.95 | [20] |
| N-Ni <sub>3</sub> S <sub>2</sub> /NF             | 1.48 | ≈1.83 | [21] |
| NiCo <sub>2</sub> S <sub>4</sub> nanowire arrays | 1.63 | —     | [22] |
| NiFeOOH                                          | —    | 1.49  | [23] |
| CP/CTs/Co-S                                      | 1.74 | —     | [24] |
| NiCoP                                            | 1.58 | ≈1.81 | [25] |
| CoFeZr oxides/NF                                 | 1.63 | ≈1.80 | [26] |
| MoS <sub>2</sub> -NiS <sub>2</sub> /NGF          | 1.64 | —     | [27] |
| Ni-graphitic carbon (NGC)                        | 1.64 | —     | [28] |
| Mo-Ni <sub>3</sub> S <sub>2</sub> nano-rods      | 1.53 | —     | [29] |
| Ni@NC800/NF                                      | 1.60 | —     | [30] |
| Ni <sub>1-x</sub> Fe <sub>x</sub> /NC/NF         | 1.58 | —     | [31] |
| MoO <sub>3</sub> /Ni-NiO                         | 1.55 | —     | [32] |
| Cu@CuS                                           | 1.52 | —     | [33] |

**Table S3.** A conclusion of the Zn-air battery activities for the recently reported self-powered trifunctional catalysts.

| Trifunctional catalyst | Voltage at 10 mA cm <sup>-2</sup> (OWS) | Battery voltage (V) | Power density (mW cm <sup>-2</sup> ) | Charging and discharging cycle time @ 10 mA cm <sup>-2</sup> (h) | Voltage gap (V) | Reference |
|------------------------|-----------------------------------------|---------------------|--------------------------------------|------------------------------------------------------------------|-----------------|-----------|
| Sn-KFO                 | 1.55                                    | 1.365               | 136.9                                | > 1000                                                           | 0.817           | This work |
| KFO                    | 1.59                                    | 1.33                | 130.1                                | 320                                                              | 0.910           | This work |
| Pt/C-RuO <sub>2</sub>  | 1.54                                    | 1.35                | 95.4                                 | 170                                                              | 0.881           | This work |
| Pt@Fe-MOF              | 1.46                                    | 1.40                | 104                                  | 95                                                               | --              | [34]      |
| NiCoP/NiO              | 1.71                                    | 1.43                | 84.5                                 | 113                                                              | 0.84--0.86      | [35]      |
| Fe-NiCoP               | 1.60                                    | 1.40                | --                                   | 900 cycles @ 5                                                   | --              | [36]      |

|                                                      |      |      |       | mA cm <sup>-2</sup>                    |                |      |
|------------------------------------------------------|------|------|-------|----------------------------------------|----------------|------|
| Fe Doped MOF<br>CoV@CoO nanoflakes                   | 1.53 | 1.45 | 138   | 50                                     | 0.89           | [37] |
| Co-MOF-800                                           | --   | 1.38 | 144   | 85 @ 1 mA<br>cm <sup>-2</sup>          | 0.46--<br>0.58 | [38] |
| Co@NCL                                               | 1.70 | 1.47 | 170   | 200                                    | 0.88           | [39] |
| Co/N-CNF-800                                         | 1.80 | --   | --    | 50                                     | 1.39           | [40] |
| Fe-Co-Ni MOF                                         | 1.60 | 1.42 | 161   | 120 @ 5 mA<br>cm <sup>-2</sup>         | 0.46--<br>0.56 | [41] |
| 3%IrO <sub>x</sub> /NCNT                             | 1.52 | 1.5  | 59.3  | 120 @ 5 mA<br>cm <sup>-2</sup>         | 0.65           | [42] |
| CoFe@NC/NCHNSs-<br>700                               | 1.66 | 1.49 | 184   | 50                                     | ~0.87          | [43] |
| CoDNG900                                             | --   | 1.45 | 205.6 | 667                                    | 0.82           | [44] |
| Pt/d-CoP/NPC                                         | 1.53 | 1.39 | 182.8 | 200                                    | ~1.05          | [45] |
| MoCoP-NPC                                            | 1.65 | 1.50 | 175.2 | 300                                    | 0.47--0.5      | [46] |
| FeZn <sub>4</sub> Co@CNFs                            | --   | 1.50 | 107.6 | 118                                    | ~0.87          | [47] |
| Co-COP                                               | --   | 1.46 | 83.6  | --                                     | --             | [48] |
| SC-Cu <sub>SA</sub> -NC                              | 1.58 | 1.48 | 124.9 | 120                                    | ~0.9           | [49] |
| Fe-N-C/FeP <sub>x</sub> /NPSC                        | 1.57 | 1.49 | 216.9 | 93                                     | 0.87-<br>0.96  | [50] |
| RuCoO <sub>x</sub>                                   | 1.54 | 1.54 | 160   | 1100 cycles @<br>5 mA cm <sup>-2</sup> | ~0.86          | [51] |
| RuCo/NPC                                             | 1.68 | 1.45 | 79.4  | 16.67 @ 2 mA<br>cm <sup>-2</sup>       | ~0.75          | [52] |
| Re-Ni <sub>3</sub> S <sub>2</sub> /NG/NF             | 1.58 | 1.36 | 99    | 266                                    | ~0.88          | [53] |
| NAC@Co <sub>3</sub> O <sub>4</sub> /NCNTs/C<br>NF    | --   | 1.43 | 267.6 | 67                                     | 0.8--1.25      | [54] |
| Pd-coated<br>(CoFe/NCNTs)                            | 1.60 | 1.48 | 261   | 50                                     | 0.69           | [55] |
| CoP/Co <sub>3</sub> O <sub>4</sub> -fC-pPVP          | 1.58 | 1.49 | 154   | 727 @ 5 mA<br>cm <sup>-2</sup>         | ~0.75          | [56] |
| CoFeN-NCNTs//CCM                                     | 1.63 | 1.46 | 145   | 445                                    | 0.76           | [57] |
| B-CoSe <sub>2</sub> @CoNi LDH<br>HNA                 | 1.58 | 1.41 | 181.5 | 70 @ 1 mA<br>cm <sup>-2</sup>          | ~0.8           | [58] |
| NiCu-MoS <sub>2</sub>                                | 1.62 | 1.43 | 283   | 133                                    | 0.71-<br>0.74  | [59] |
| FeSn <sub>2</sub> @FeSnO <sub>x</sub> @S-N-<br>C-900 | --   | 1.50 | 64.5  | 24                                     | 1.5            | [60] |
| SnSb-NC                                              | --   | 1.58 | 195.8 | 1106                                   | ~1.3           | [61] |
| Sn <sub>x=0.15</sub> -Ga <sub>2</sub> O <sub>3</sub> | --   | --   | 138   | 30                                     | 0.58           | [62] |

#### 4. Reference

- [1] Jian, J.; Yuan, L.; Qi, H.; Sun, X. J.; Zhang, L.; Li, H.; Yuan, H. M.; Feng, S. H. *ACS Appl. Mater. Inter.* **2018**, 10, 40568.
- [2] Jian, J.; H. M. Yuan, and et al. *J. Mater. Chem. A* **2021**, 9, 7586-7593.
- [3] Perdew, J. P.; Burke, K.; Ernzerhof, M. *Phys. Rev. Lett.* **1998**, 77, 3865.
- [4] Blochl, P. E. *Phys. Rev. B* **1994**, 50, 17953.
- [5] Nørskov, J. K.; Bligaard, T.; Logadottir, A.; Kitchin, J. R.; Chen, J.; Pandalov, S.; Stimming, U. *J. Electrochem. Soc.* **2005**, 152, J23.
- [6] Yang, Z. K.; Zhao, C. M.; Qu, Y. T.; Zhou, H.; Zhou, F. Y.; Wang, J.; Wu, Y.; Li, Y. D. *Adv. Mater.* **2019**, 31, 1808043.
- [7] Du, Feng.; Shi, L.; Zhang, Y. T.; Li, T.; Wang, J. L.; Wen, G. H.; Alsaedi, A.; Hayat, T.; Zhou, Y.; Zou, Z. G. *Appl. Catal., B* **2019**, 253, 246.
- [8] Zhang, Y.; Shao, Q.; Long, S.; Huang, X. Q. *Nano Energy* **2018**, 45, 448.
- [9] Gu, Y. Chen, S.; Ren, J.; Jia, Y.; Chen, C. M.; Komarneni, S.; Yang, D. J.; Yao, X. D. *ACS Nano* **2018**, 12, 245.
- [10] Wang, Z. C.; Liu, H. L.; Ge, R. X.; Ren, X.; Ren, J.; Yang, D. J.; Zhang, L. X.; Sun, X. P. *ACS Catal.* **2018**, 8, 2236.
- [11] Xiu, L. Y.; Wang, Z. Y.; Yu, M. Z.; Wu, X. H.; Qiu, J. S. *ACS Nano* **2018**, 12, 8017.
- [12] Zhang, F. F.; Ge, Y. C.; Chu, H.; Dong, P.; Baines, R.; Pei, Y.; Ye, M. X.; Shen, J. F. *ACS Appl. Mater. Inter.* **2018**, 10, 7087.
- [13] Liu, J. S.; Zheng, Y.; Jiao, Y.; Wang, Z. Y.; Lu, Z. G.; Vasileff, A.; Qiao, S. -Z. *Small* **2018**, 14, 1704073.
- [14] Li, Y. J.; Zhang, H. C.; Jiang, M.; Zhang, Q.; He, P. L.; Sun, X. M. *Adv. Funct. Mater.* **2017**, 27, 1702513.

- [15] Lv, J. J.; Zhao, J.; Fang, H.; Jiang, L. P.; Li, L. L.; Ma, J.; Zhu, J. J. *Small* **2017**, 13, 1700264.
- [16] Niu, S.; Jiang, W. -J.; Tang, T.; Zhang, Y.; Li, J. -H.; Hu J. -S. *Adv. Sci.* **2017**, 4, 1700084.
- [17] Du, C. C.; Shang, M. X.; Mao J. X.; Song W. B. *J. Mater. Chem. A* **2017**, 5, 15940.
- [18] Balogun, M. -S.; Qiu, W. T.; Huang, Y. C.; Yang, H.; Xu, R. M.; Zhao, W. X.; Li, G. -R.; Ji, H. B.; Tong, Y. X. *Adv. Mater.* **2017**, 1702095.
- [19] Liu, Y. P.; Li, Q. J.; Si, R.; Li, G. -D.; Li, W.; Liu, D. -P.; Wang, D. J.; Sun, L.; Zhang, Y.; Zou, X. X. *Adv. Mater.* **2017**, 29, 1606200.
- [20] Duan, J. J.; Chen, S.; Vasileff, A.; Qiao, S. Z. *ACS Nano* **2016**, 10, 8738
- [21] Chen, P. Z.; Zhou, T. P.; Zhang, M. X.; Tong, Y.; Zhong, C. A.; Zhang, N.; Zhang, L. D.; Wu, C. Z.; Xie, Y. *Adv. Mater.* **2017**, 29, 1701584.
- [22] Sivanantham, A.; Ganesan, P.; Shanmugam, S. *Adv. Funct. Mater.* **2016**, 26, 4661.
- [23] Zhou, H. Q.; Yu, F.; Zhu, Q.; Sun, J. Y.; Qin, F.; Yu, L.; Bao, J. M.; Yu, Y.; Chen, S.; Ren, Z. F. *Energy Environ. Sci.* **2018**, 11, 2858.
- [24] Wang, J.; Zhong, H. -X.; Wang, Z. -L.; Meng, F. -L.; Zhang, X. -B. *ACS Nano* **2016**, 10, 2342.
- [25] Liang, H. F.; Gandi, A. N.; Anjum, D. H.; Wang, X. B.; Schwingenschlogl, U.; Alshareef, H. N. *Nano Lett.* **2016**, 16, 7718.
- [26] Huang, L. L.; Chen, D. W.; Luo, G.; Lu, Y. -R.; Chen, C.; Zou, Y. Q.; Dong, C. -L.; Li, Y. F.; Wang, S. Y. *Adv. Mater.* **2019**, 1901439.
- [27] Kuang, P. Y.; He, M.; Zou, H. Y.; Yu, J. G.; Fan, K. *Appl. Catal., B* **2019**, 254, 15.
- [28] Zhou, B. H.; Zhang, M. C.; He, W. Y.; Wang, H. M.; Jian, M. Q.; Zhang, Y. Y. *Carbon* **2019**, 150, 21.
- [29] Cui, Z.; Ge, Y. C.; Chu, H.; Baines, R.; Dong, P.; Tang, J. H.; Yang, Y.; Ajayan, P. M.; Ye, M. X.; Shen, J. F. *J. Mater. Chem. A*, **2017**, 5, 1595.

- [30] Xu, Y.; Tu, W. G.; Zhang, B. W.; Yin, S. M.; Huang, Y. Z.; Kraft, M.; Xu, R. *Adv. Mater.* **2017**, 29, 1605957.
- [31] Zhang, X.; Xu, H. M.; Li, X. X.; Li, Y. Y.; Yang, T. B.; Liang, Y. Y. *ACS Catal.* **2016**, 6, 580.
- [32] Li, X. P.; Wang, Y.; Wang, J. J.; Da, Y. M.; Zhang, J. F.; Li, L. L.; Zhong, C.; Deng, Y. D.; Han, X. P.; Hu, W. B. *Adv. Mater.* **2020**, 32, 2003414.
- [33] Doan, T. L. L.; Tran, D. T.; Nguyen, D. C.; Kim, D. H.; Kim, N. H.; Lee, J. H. *Adv. Funct. Mater.* **2020**, 2007822.
- [34] Wang, C.-P.; Bu, X.-H.; and et al. *Small* **2023**, 2305201.
- [35] Hu, X. L.; Pan, F. S.; and et al. *Green Energy Environ.* **2023**, 8, 601-611.
- [36] He, B.; Su, Z.; and et al. *CrystEngComm* **2021**, 23, 3861.
- [37] Muthurasu, A.; Kim, H. Y.; and et al. *Nano Energy*, **2021**, 106238.
- [38] Duan, X. D.; Zheng, H. G.; and et al. *J. Energy. Chem.* **2021**, 56, 290-298.
- [39] Liu, Q.; Yang, W. Y. and et al. *Chemical Eng. J.* **2021**, 423, 130313.
- [40] Liu, J.; Leung, K. H. and et al. *ACS Appl. Mater. Interfaces* **2022**, 14, 4399-4408.
- [41] Farahani, F. S.; Mousavi, M. F.; and et al. *J. Am. Chem. Soc.* **2022**, 144, 15903-15906.
- [42] Liu, N.; Guan, J. Q.; and et al. *Electrochimica Acta* **2021**, 380, 138215.
- [43] Wang, S. J.; Hu, Y.; and et al. *Appl. Catal., B* **2021**, 298, 120512.
- [44] Wang, A. S.; Wang, W. C.; and et al. *Appl. Catal., B* **2021**, 281, 119514.
- [45] Wu, Z. X.; Wang, L.; and et al. *Chinese J. Catal.* **2023**, 46, 36-47.
- [46] Zhao, S. L.; Zhu, Z. H.; and et al. *Small* **2023**, 2302414.
- [47] Wang, F. L.; Chen, Y. L.; and et al. *J. Power Sources* **2022**, 521, 230925.
- [48] Yao, Y.-F.; Xiao, X.-Y.; and et al. *Catal. Sci. Technol.* **2023**, 13, 6321-6330.
- [49] Zhang, Y. L.; Guo, S. H.; and et al. *Composites Part B* **2023**, 253, 110575.
- [50] Li, P.; Liu, S.; and et al. *Chemical Eng. J.* **2021**, 421, 129704.

- [51] Zhou, C. H.; Zhang, R. F.; and et al. *Nano Lett.* **2021**, 21, 9633-9641.
- [52] Pei, Y.; Wang, J. C.; and et al. *Chem. Commun.* **2021**, 57, 1498-1501.
- [53] Han, X. T.; Li, N. N.; and et al. *Composites Part B* **2022**, 234, 109670.
- [54] Yao, X. Y.; Zhang, W. M.; and et al. *Inorg. Chem. Front.* **2022**, 9, 2517-2529.
- [55] Manjunatha, R.; Zhang, J. J.; and et al. *Green Energy Environ.* **2022**, 7, 933-947.
- [56] Liu, Z.; Xu, W. J.; and et al. *Electrochimica Acta* **2022**, 412, 140134.
- [57] Zhou, G. Z.; Wang, L.; and et al. *Adv. Funct. Mater.* **2021**, 2107608.
- [58] Song, J. N.; Peng, S. J.; and et al. *Adv. Sci.* **2022**, 2104522.
- [59] Kumar, M.; Nagaiah, T. C.; and et al. *J. Mater. Chem. A* **2023**, 11, 18336-18348.
- [60] Zhang, X. Y.; Shan, Y. K.; and et al. *Electrochimica Acta* **2019**, 320.
- [61] Li, S. T.; Yang, Q.; and et al. *Inorg. Chem. Front.* **2023**, 10, 3568-3576.
- [62] Nair, A. N.; Sreenivasan, S. T.; *Small* **2022**, 18, 2202648.
